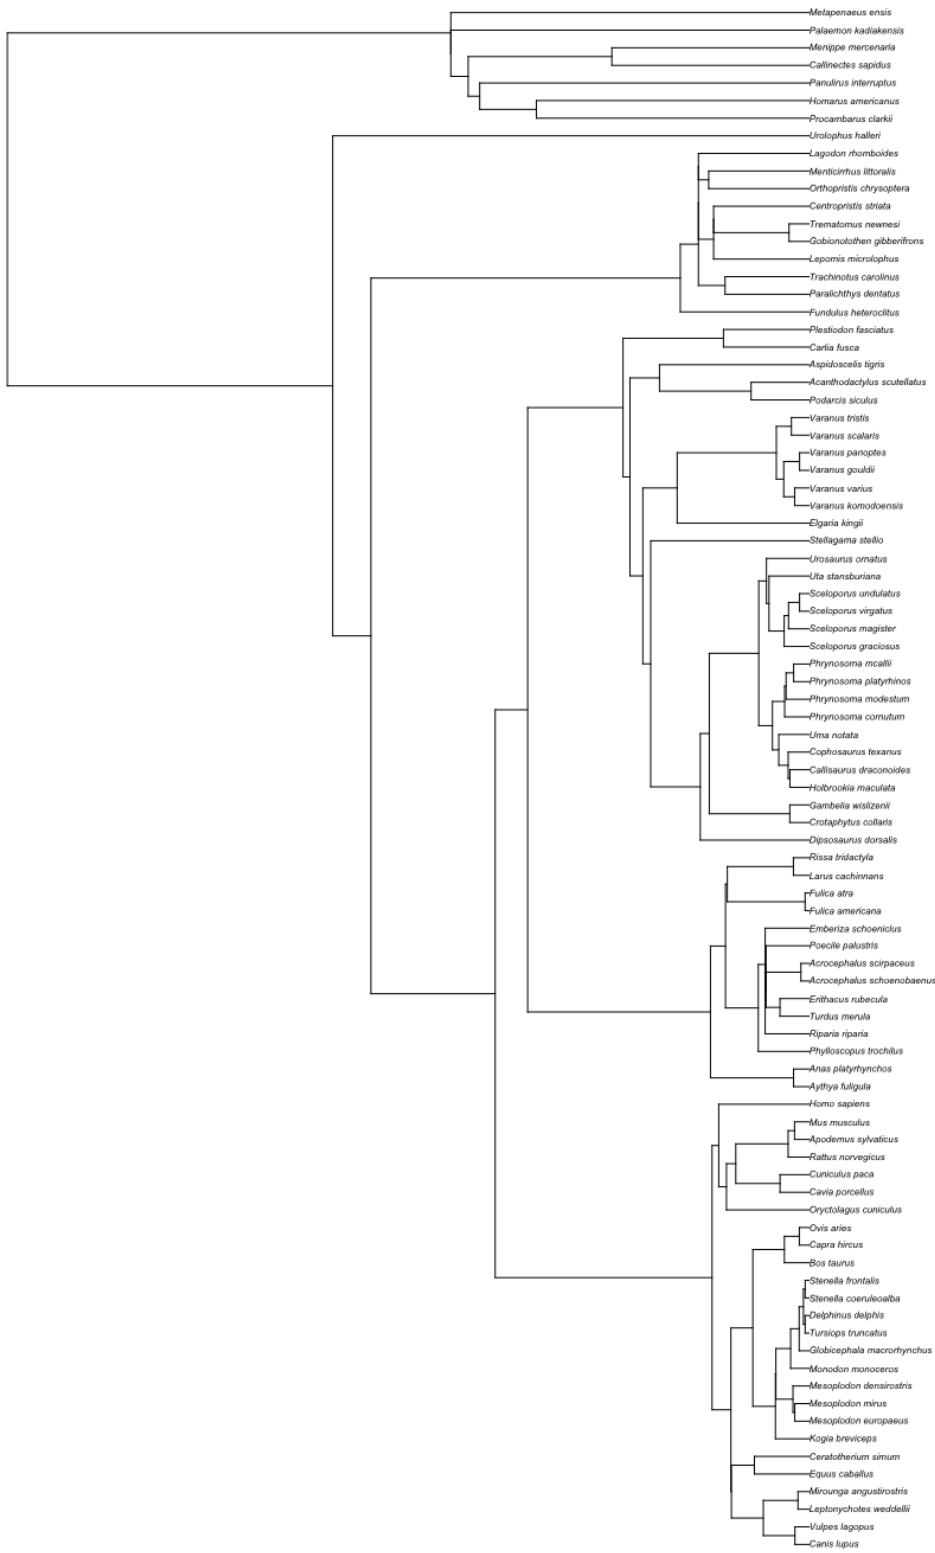

**Fig. S1. Phylogenetic tree used in comparative analysis.** Tree is also included as an .nwk file on figshare.

**Table S1. Raw and mass-corrected mean fCSA values by muscle and individual**

| muscle  | species               | body mass (g) | Raw fCSA ( $\mu\text{m}^2$ ) |                    | Relative fCSA ( $\mu\text{m}^2$ ) |                    |
|---------|-----------------------|---------------|------------------------------|--------------------|-----------------------------------|--------------------|
|         |                       |               | mean                         | standard deviation | mean                              | standard deviation |
| cFem    | <i>V. tristis</i>     | 104.5         | 6,499.66                     | 1,268.43           | 62.20                             | 12.14              |
| cFem    | <i>V. tristis</i>     | 163.3         | 7,644.47                     | 592.60             | 46.81                             | 3.63               |
| cFem    | <i>V. panoptes</i>    | 661.21        | 3,704.77                     | 256.44             | 5.60                              | 0.39               |
| cFem    | <i>V. varius</i>      | 810           | 3,211.71                     | 236.96             | 3.97                              | 0.29               |
| cFem    | <i>V. varius</i>      | 834           | 5,321.32                     | 930.96             | 6.38                              | 1.12               |
| cFem    | <i>V. panoptes</i>    | 997           | 5,544.28                     | 533.40             | 5.56                              | 0.54               |
| cFem    | <i>V. panoptes</i>    | 1,059.88      | 8,025.07                     | 940.93             | 7.57                              | 0.89               |
| cFem    | <i>V. varius</i>      | 4,025         | 7,265.99                     | 322.96             | 1.81                              | 0.08               |
| cFem    | <i>V. komodoensis</i> | 30,000        | 24,778.66                    | 11,534.93          | 0.83                              | 0.38               |
| cFem    | <i>V. komodoensis</i> | 40,000        | 7,591.19                     | 1,125.02           | 0.19                              | 0.03               |
| femTib  | <i>V. tristis</i>     | 104.5         | 7,876.51                     | 1,123.09           | 75.37                             | 10.75              |
| femTib  | <i>V. scalaris</i>    | 158.1         | 2,759.81                     | 730.53             | 17.46                             | 4.62               |
| femTib  | <i>V. tristis</i>     | 163.3         | 6,268.97                     | 381.82             | 38.39                             | 2.34               |
| femTib  | <i>V. varius</i>      | 810           | 4,528.49                     | 485.82             | 5.59                              | 0.60               |
| femTib  | <i>V. varius</i>      | 834           | 6,484.88                     | 2,251.49           | 7.78                              | 2.70               |
| femTib  | <i>V. panoptes</i>    | 997           | 11,555.49                    | 372.60             | 11.59                             | 0.37               |
| femTib  | <i>V. panoptes</i>    | 1,059.88      | 11,268.63                    | 3,814.30           | 10.63                             | 3.60               |
| femTib  | <i>V. varius</i>      | 4,025         | 15,961.82                    | 7,148.07           | 3.97                              | 1.78               |
| femTib  | <i>V. komodoensis</i> | 30,000        | 30,188.29                    | -                  | 1.01                              | 0.00               |
| femTib  | <i>V. komodoensis</i> | 40,000        | 18,462.98                    | 1,085.76           | 0.46                              | 0.03               |
| FTIdeep | <i>V. tristis</i>     | 104.5         | 4,610.64                     | 1,247.99           | 44.12                             | 11.94              |
| FTIdeep | <i>V. scalaris</i>    | 158.1         | 4,252.35                     | 893.32             | 26.90                             | 5.65               |
| FTIdeep | <i>V. tristis</i>     | 163.3         | 6,318.58                     | 865.71             | 38.69                             | 5.30               |
| FTIdeep | <i>V. varius</i>      | 810           | 5,669.94                     | --                 | 7.00                              | --                 |
| FTIdeep | <i>V. varius</i>      | 834           | 3,781.07                     | --                 | 4.53                              | --                 |
| FTIdeep | <i>V. panoptes</i>    | 997           | 8,581.47                     | 1,646.59           | 8.61                              | 1.65               |
| FTIdeep | <i>V. panoptes</i>    | 1,059.88      | 8,682.06                     | 1,355.53           | 8.19                              | 1.28               |
| FTIdeep | <i>V. varius</i>      | 4,025         | 11,426.89                    | --                 | 2.84                              | --                 |
| FTIdeep | <i>V. komodoensis</i> | 30,000        | 13,769.61                    | 1,407.61           | 0.46                              | 0.05               |
| FTIdeep | <i>V. komodoensis</i> | 40,000        | 5,269.33                     | 678.24             | 0.13                              | 0.02               |
| FTIsup  | <i>V. tristis</i>     | 104.5         | 4,814.96                     | 650.50             | 46.08                             | 6.22               |
| FTIsup  | <i>V. scalaris</i>    | 158.1         | 3,642.59                     | 642.29             | 23.04                             | 4.06               |
| FTIsup  | <i>V. tristis</i>     | 163.3         | 4,727.06                     | 828.16             | 28.95                             | 5.07               |
| FTIsup  | <i>V. varius</i>      | 810           | 3,954.12                     | --                 | 4.88                              | --                 |
| FTIsup  | <i>V. varius</i>      | 834           | 5,049.69                     | --                 | 6.05                              | --                 |
| FTIsup  | <i>V. panoptes</i>    | 997           | 4,335.67                     | 963.97             | 4.35                              | 0.97               |
| FTIsup  | <i>V. panoptes</i>    | 1,059.88      | 10,500.61                    | 984.41             | 9.91                              | 0.93               |
| FTIsup  | <i>V. varius</i>      | 4,025         | 15,451.04                    | --                 | 3.84                              | --                 |
| FTIsup  | <i>V. komodoensis</i> | 30,000        | 12,413.70                    | --                 | 0.41                              | --                 |
| FTIsup  | <i>V. komodoensis</i> | 40,000        | 16,182.82                    | --                 | 0.40                              | --                 |
| gast    | <i>V. tristis</i>     | 104.5         | 3,119.62                     | 619.15             | 29.85                             | 5.92               |
| gast    | <i>V. scalaris</i>    | 158.1         | 4,510.32                     | 485.50             | 28.53                             | 3.07               |
| gast    | <i>V. tristis</i>     | 163.3         | 3,677.10                     | --                 | 22.52                             | --                 |

|       |                       |          |           |          |       |       |
|-------|-----------------------|----------|-----------|----------|-------|-------|
| gast  | <i>V. gouldii</i>     | 429.4    | 5,847.88  | 347.21   | 13.62 | 0.81  |
| gast  | <i>V. gouldii</i>     | 439.8    | 3,380.39  | 405.86   | 7.69  | 0.92  |
| gast  | <i>V. gouldii</i>     | 459.3    | 3,506.02  | 640.20   | 7.63  | 1.39  |
| gast  | <i>V. panoptes</i>    | 661.21   | 4,173.04  | 1,560.35 | 6.31  | 2.36  |
| gast  | <i>V. varius</i>      | 810      | 3,223.55  | 261.86   | 3.98  | 0.32  |
| gast  | <i>V. varius</i>      | 834      | 5,198.79  | 549.71   | 6.23  | 0.66  |
| gast  | <i>V. panoptes</i>    | 997      | 3,362.91  | 469.49   | 3.37  | 0.47  |
| gast  | <i>V. panoptes</i>    | 1,059.88 | 8,420.07  | 1,718.24 | 7.94  | 1.62  |
| gast  | <i>V. panoptes</i>    | 2,076.8  | 15,998.01 | 5,128.63 | 7.70  | 2.47  |
| gast  | <i>V. varius</i>      | 4,025    | 16,294.56 | 2,001.01 | 4.05  | 0.50  |
| gast  | <i>V. komodoensis</i> | 30,000   | 14,453.57 | 1,566.63 | 0.48  | 0.05  |
| gast  | <i>V. komodoensis</i> | 40,000   | 8,577.71  | --       | 0.21  | --    |
| ilFem | <i>V. tristis</i>     | 104.5    | 2,071.16  | 623.90   | 19.82 | 5.97  |
| ilFem | <i>V. scalaris</i>    | 158.1    | 2,948.93  | 296.70   | 18.65 | 1.88  |
| ilFem | <i>V. tristis</i>     | 163.3    | 6,930.08  | 953.42   | 42.44 | 5.84  |
| ilFem | <i>V. varius</i>      | 810      | 6,061.00  | --       | 7.48  | --    |
| ilFem | <i>V. varius</i>      | 834      | 9,249.29  | --       | 11.09 | --    |
| ilFem | <i>V. panoptes</i>    | 997      | 3,996.54  | 1,225.36 | 4.01  | 1.23  |
| ilFem | <i>V. panoptes</i>    | 1,059.88 | 4,467.86  | 187.87   | 4.22  | 0.18  |
| ilFem | <i>V. varius</i>      | 4,025    | 8,949.86  | --       | 2.22  | --    |
| ilFem | <i>V. komodoensis</i> | 30,000   | 7,529.79  | 1,426.54 | 0.25  | 0.05  |
| ilFem | <i>V. komodoensis</i> | 40,000   | 6,306.21  | 1,620.95 | 0.16  | 0.04  |
| ilFib | <i>V. tristis</i>     | 104.5    | 5,104.01  | 1,319.41 | 48.84 | 12.63 |
| ilFib | <i>V. scalaris</i>    | 158.1    | 3,426.04  | 1,141.04 | 21.67 | 7.22  |
| ilFib | <i>V. tristis</i>     | 163.3    | 4,434.15  | 301.24   | 27.15 | 1.84  |
| ilFib | <i>V. gouldii</i>     | 429.4    | 7,233.26  | 1,984.78 | 16.85 | 4.62  |
| ilFib | <i>V. gouldii</i>     | 439.8    | 4,596.89  | 1,180.49 | 10.45 | 2.68  |
| ilFib | <i>V. gouldii</i>     | 459.3    | 5,906.07  | 2,297.15 | 12.86 | 5.00  |
| ilFib | <i>V. panoptes</i>    | 661.21   | 2,879.90  | 1,561.23 | 4.36  | 2.36  |
| ilFib | <i>V. varius</i>      | 810      | 4,461.53  | 970.24   | 5.51  | 1.20  |
| ilFib | <i>V. varius</i>      | 834      | 4,472.49  | 1,199.65 | 5.36  | 1.44  |
| ilFib | <i>V. panoptes</i>    | 997      | 4,722.56  | 1,228.43 | 4.74  | 1.23  |
| ilFib | <i>V. panoptes</i>    | 1,059.88 | 5,784.59  | 1,419.43 | 5.46  | 1.34  |
| ilFib | <i>V. panoptes</i>    | 2,076.8  | 5,560.71  | 2,743.61 | 2.68  | 1.32  |
| ilFib | <i>V. varius</i>      | 4,025    | 8,114.42  | 881.47   | 2.02  | 0.22  |
| ilFib | <i>V. komodoensis</i> | 30,000   | 15,618.95 | 6,942.74 | 0.52  | 0.23  |
| ilFib | <i>V. komodoensis</i> | 40,000   | 8,961.49  | 1,562.80 | 0.24  | 0.07  |
| ilTib | <i>V. tristis</i>     | 104.5    | 7,297.89  | 2,548.92 | 69.84 | 24.39 |
| ilTib | <i>V. scalaris</i>    | 158.1    | 2,910.14  | 352.97   | 18.41 | 2.23  |
| ilTib | <i>V. tristis</i>     | 163.3    | 3,980.88  | 1,113.23 | 24.38 | 6.82  |
| ilTib | <i>V. gouldii</i>     | 439.8    | 5,188.40  | 546.12   | 11.80 | 1.24  |
| ilTib | <i>V. gouldii</i>     | 459.3    | 3,419.67  | 1,937.69 | 7.45  | 4.22  |
| ilTib | <i>V. panoptes</i>    | 661.21   | 3,853.98  | 131.42   | 5.83  | 0.20  |
| ilTib | <i>V. varius</i>      | 834      | 4,284.02  | 414.84   | 5.14  | 0.50  |
| ilTib | <i>V. panoptes</i>    | 997      | 6,174.24  | 1,085.81 | 6.19  | 1.09  |
| ilTib | <i>V. panoptes</i>    | 1,059.88 | 5,037.14  | 530.38   | 4.75  | 0.50  |
| ilTib | <i>V. panoptes</i>    | 2,076.8  | 2,560.57  | 668.75   | 1.23  | 0.32  |
| ilTib | <i>V. varius</i>      | 4,025    | 12,271.05 | 970.96   | 3.05  | 0.24  |

|        |                       |          |           |          |       |       |
|--------|-----------------------|----------|-----------|----------|-------|-------|
| iITib  | <i>V. komodoensis</i> | 30,000   | 11,352.46 | 6,338.59 | 0.38  | 0.21  |
| iITib  | <i>V. komodoensis</i> | 40,000   | 8,201.48  | 1,944.28 | 0.21  | 0.05  |
| pLong  | <i>V. tristis</i>     | 104.5    | 5,660.09  | 2,299.33 | 54.16 | 22.00 |
| pLong  | <i>V. scalaris</i>    | 158.1    | 3,650.03  | 617.71   | 23.09 | 3.91  |
| pLong  | <i>V. tristis</i>     | 163.3    | 2,888.58  | 353.85   | 17.69 | 2.17  |
| pLong  | <i>V. panoptes</i>    | 661.21   | 2,650.28  | 328.44   | 4.01  | 0.50  |
| pLong  | <i>V. varius</i>      | 810      | 2,983.45  | 298.23   | 3.68  | 0.37  |
| pLong  | <i>V. varius</i>      | 834      | 4,097.80  | 523.69   | 4.91  | 0.63  |
| pLong  | <i>V. panoptes</i>    | 997      | 4,244.36  | 488.77   | 4.26  | 0.49  |
| pLong  | <i>V. panoptes</i>    | 1,059.88 | 5,935.56  | 1,078.07 | 5.60  | 1.02  |
| pLong  | <i>V. varius</i>      | 4,025    | 16,113.57 | 2,549.59 | 4.00  | 0.63  |
| pLong  | <i>V. komodoensis</i> | 30,000   | 12,716.55 | 4,041.46 | 0.42  | 0.13  |
| pLong  | <i>V. komodoensis</i> | 40,000   | 12,664.75 | 2,731.63 | 0.32  | 0.07  |
| pTib   | <i>V. tristis</i>     | 104.5    | 5,988.35  | 352.70   | 57.30 | 3.38  |
| pTib   | <i>V. scalaris</i>    | 158.1    | 3,650.03  | 617.71   | 23.09 | 3.91  |
| pTib   | <i>V. panoptes</i>    | 661.21   | 2,650.28  | 328.44   | 4.01  | 0.50  |
| pTib   | <i>V. varius</i>      | 810      | 3,945.06  | 522.01   | 4.87  | 0.64  |
| pTib   | <i>V. varius</i>      | 834      | 5,728.34  | 2,034.81 | 6.87  | 2.44  |
| pTib   | <i>V. panoptes</i>    | 997      | 3,958.92  | 655.38   | 3.97  | 0.66  |
| pTib   | <i>V. panoptes</i>    | 1,059.88 | 7,375.38  | 624.64   | 6.96  | 0.59  |
| pTib   | <i>V. varius</i>      | 4,025    | 13,453.17 | 1,527.09 | 3.34  | 0.38  |
| pTib   | <i>V. komodoensis</i> | 30,000   | 6,359.45  | 2,640.52 | 0.21  | 0.09  |
| pTib   | <i>V. komodoensis</i> | 40,000   | 14,515.04 | 4,247.53 | 0.36  | 0.11  |
| tibAnt | <i>V. tristis</i>     | 104.5    | 2,278.34  | 322.44   | 21.80 | 3.09  |
| tibAnt | <i>V. scalaris</i>    | 158.1    | 3,465.21  | 910.04   | 21.92 | 5.76  |
| tibAnt | <i>V. tristis</i>     | 163.3    | 2,577.09  | 473.29   | 15.78 | 2.90  |
| tibAnt | <i>V. gouldii</i>     | 429.4    | 4,578.79  | 1,352.71 | 10.66 | 3.15  |
| tibAnt | <i>V. gouldii</i>     | 439.8    | 3,308.69  | 894.38   | 7.52  | 2.03  |
| tibAnt | <i>V. gouldii</i>     | 459.3    | 4,037.06  | 419.28   | 8.79  | 0.91  |
| tibAnt | <i>V. panoptes</i>    | 661.21   | 2,571.31  | 67.01    | 3.89  | 0.10  |
| tibAnt | <i>V. varius</i>      | 810      | 2,972.41  | 376.24   | 3.67  | 0.46  |
| tibAnt | <i>V. varius</i>      | 834      | 2,939.13  | 255.49   | 3.52  | 0.31  |
| tibAnt | <i>V. panoptes</i>    | 997      | 3,506.42  | 1,850.42 | 3.52  | 1.86  |
| tibAnt | <i>V. panoptes</i>    | 1,059.88 | 4,629.20  | 1,084.05 | 4.37  | 1.02  |
| tibAnt | <i>V. panoptes</i>    | 2,076.8  | 2,914.57  | 1,003.90 | 1.40  | 0.48  |
| tibAnt | <i>V. varius</i>      | 4,025    | 7,953.19  | 821.88   | 1.98  | 0.20  |
| tibAnt | <i>V. komodoensis</i> | 30,000   | 9,488.02  | 2,771.43 | 0.32  | 0.09  |
| tibAnt | <i>V. komodoensis</i> | 40,000   | 9,386.37  | 2,359.34 | 0.23  | 0.06  |
